# Supplementary material for: Multifunctional activity-based chemical probes for sirtuins
Source: Royal Society of Chemistry journal article supplement (doi:10.1039/d3ra02133e), 2023-01-01
Supplement: d3ra02133e1.pdf [file d3ra02133e1.pdf]

## Supporting Information

### Multifunctional Activity-based Chemical Probes for Sirtuins

Chiranjeev Sharma<sup>‡</sup>, Dickson Donu<sup>‡</sup>, Alyson M. Curry<sup>‡</sup>, Elizabeth Barton<sup>‡</sup>, Yana Cen<sup>‡, #, \*</sup>

<sup>‡</sup>*Department of Medicinal Chemistry, Virginia Commonwealth University, Richmond, VA 23219*

<sup>#</sup>*Institute for Structural Biology, Drug Discovery and Development, Virginia Commonwealth University, Richmond, VA 23219*

\*Correspondence: [ceny2@vcu.edu](mailto:ceny2@vcu.edu), phone: 804-828-7405

**Figure S1. Inhibitor screening panel of 20 small molecules against SIRT6.**

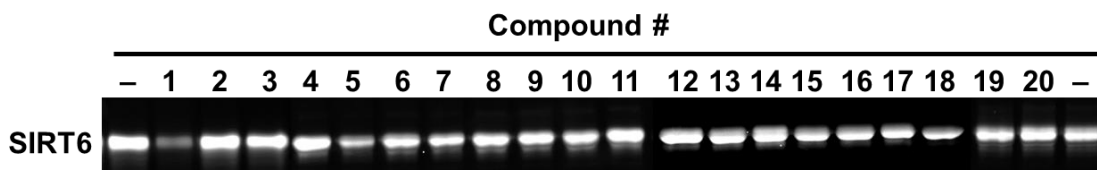

Representative gel images of SIRT6 inhibitor screening. SIRT6 was incubated with 100  $\mu$ M candidate compound or vehicle (DMSO) in the presence of 500  $\mu$ M NAD<sup>+</sup> for 30 min at 37°C. Subsequently, probe 1B was added to a final concentration of 25  $\mu$ M and labeled as described in “Methods and Materials”. The samples were resolved by SDS-PAGE and analyzed with in-gel fluorescence scanning using a Biorad ChemiDoc MP imager (excitation 532 nm, 580 nm cut-off filter and 30 nm band-pass).

Figure S2. Concentration-dependent inhibition of SIRT6 and *Af2Sir2* by TSA.

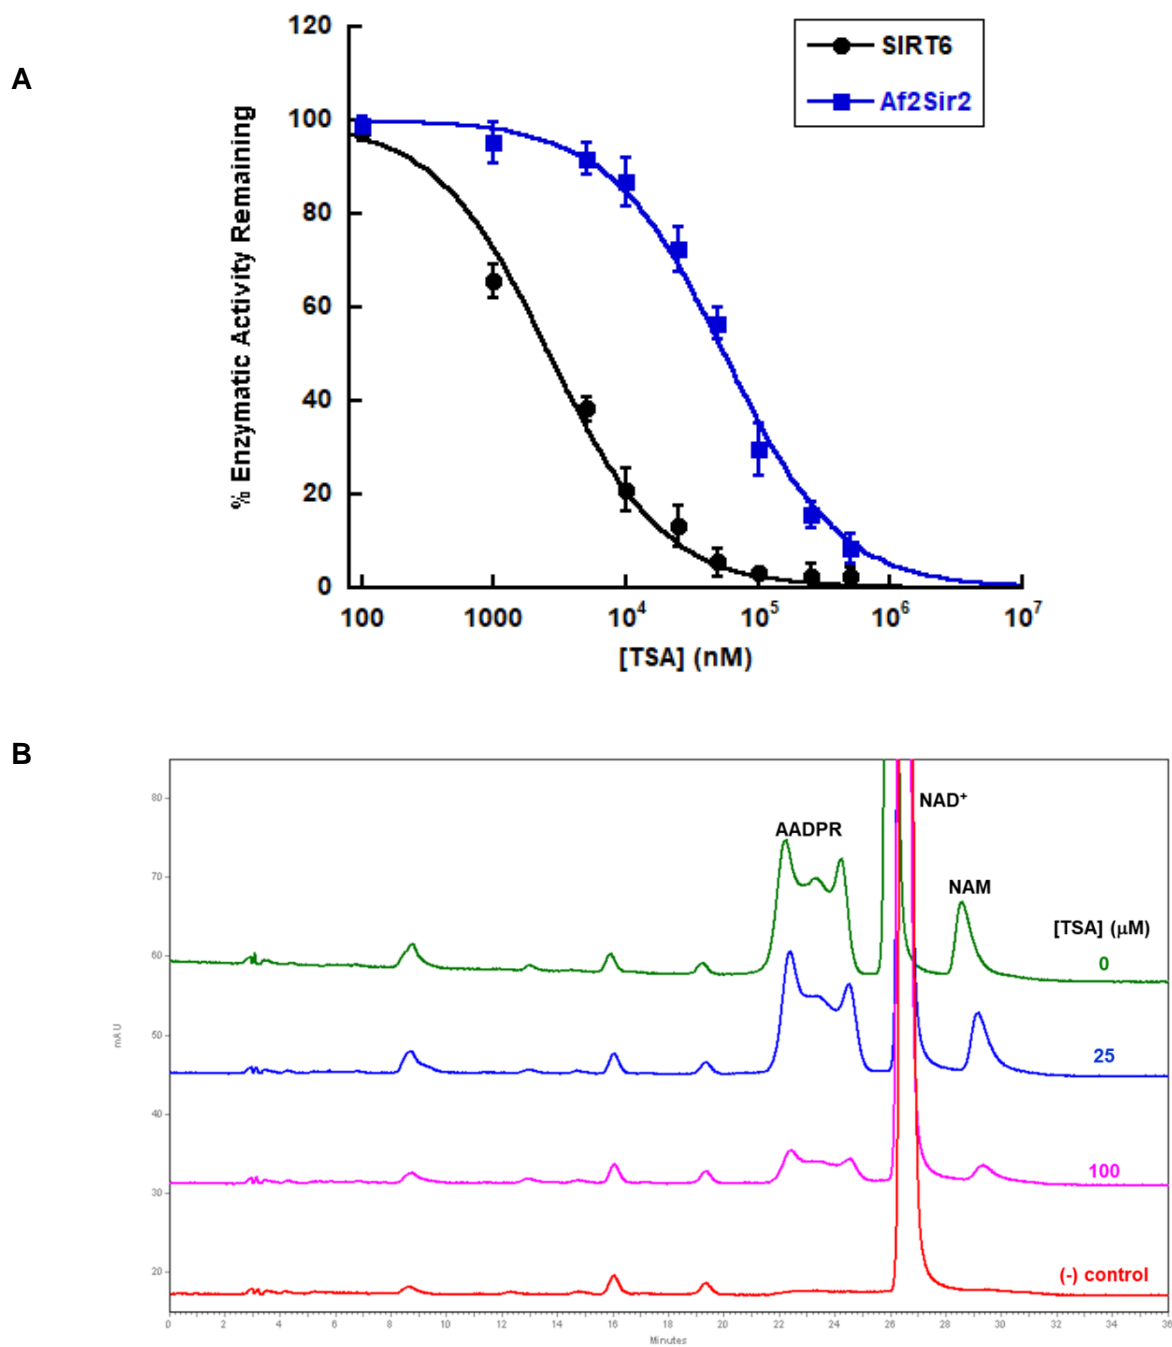

A. Dose-response curves for SIRT6 and *Af2Sir2*. The experimental details can be found in “Methods and Materials”; B. Representative HPLC chromatograms showing the inhibition of *Af2Sir2* activity by TSA. The forklike peak represents AADPR (a mixture of 2'-AADPR and 3'-AADPR). *Af2Sir2* was absent in the negative control.

## Synthesis of PRO-SIRT2

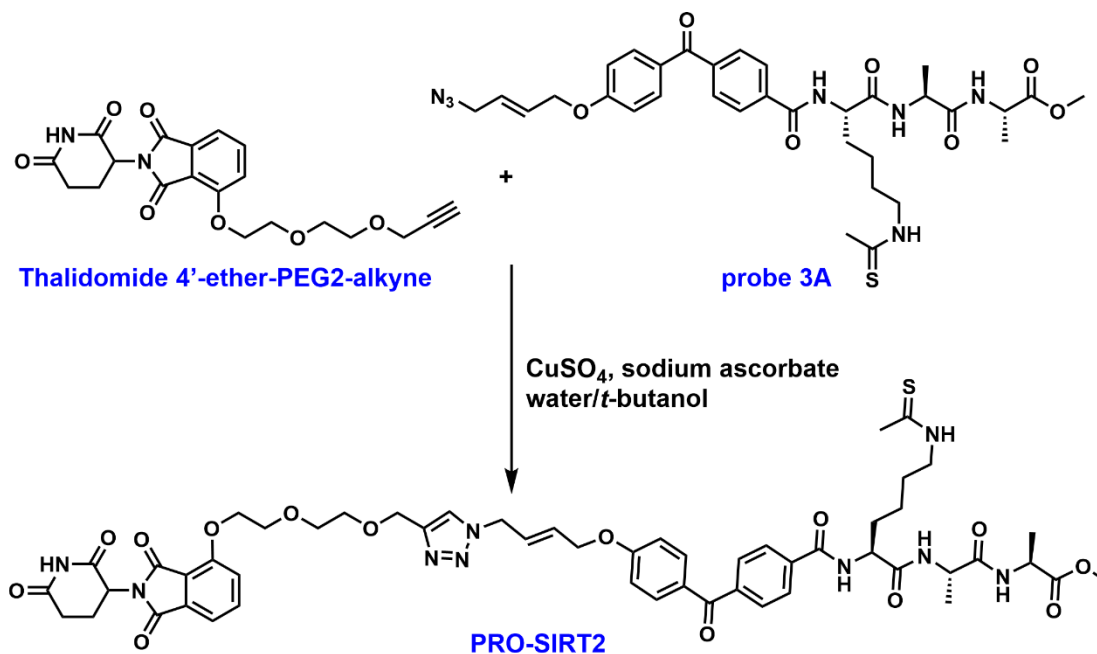

**Synthesis of probe 3A.** Probe 3A was synthesized as described previously.<sup>1</sup>

**Synthesis of PRO-SIRT2.** Probe 3A (17 mg, 0.025 mmol) and thalidomide 4'-ether-PEG2-alkyne (10 mg, 0.025 mmol) were dissolved in a mixture of water and *tert*-butanol (2 mL, v/v = 1/1). To this solution were added freshly prepared  $\text{CuSO}_4$  solution (2.5 mM) and sodium ascorbate solution (5 mM). The reaction mixture was stirred at room temperature overnight. Reaction was quenched with water, aqueous layer was extracted with  $\text{CH}_2\text{Cl}_2$ , combined organic layer was washed with brine and dried over  $\text{Na}_2\text{SO}_4$ . Solvent was evaporated under reduced pressure, and the crude product was purified by silica gel column chromatography ( $\text{CH}_2\text{Cl}_2$  with 10 to 20% methanol) to afford **PRO-SIRT2** (15 mg, 0.014 mmol, 55% yield) as a pale yellow oil.  $^1\text{H}$  NMR ( $\text{CD}_3\text{OD}$ , 400 MHz)  $\delta$  (ppm): 1.35 (m, 2H), 1.38 (d,  $J = 5.4$  Hz, 3H), 1.40 (d,  $J = 5.4$  Hz, 3H), 1.53 (m, 3H), 1.71 (m, 3H), 1.83 (m, 4H), 1.95 (m, 2H), 2.11 (m, 1H), 2.43 (s, 3H), 3.14 (m, 2H), 3.60 (t,  $J = 6.8$  Hz, 2H), 3.68 (m, 2H), 3.70 (s, 3H), 3.78 (m, 2H), 3.85 (d,  $J = 5.5$  Hz, 2H), 3.91 (m, 2H),

4.16 (d,  $J = 1.9$  Hz, 2H), 4.39 (m, 4H), 4.56, (m, 1H), 4.70 (d,  $J = 4.2$  Hz, 1H), 5.08 (dd,  $J = 5.6$ , 12.7 Hz, 1H), 6.01 (m, 2H), 7.07 (d,  $J = 8.6$  Hz, 2H), 7.45 (t,  $J = 6.6$  Hz, 2H), 7.78 (m, 6H), 7.98 (d,  $J = 8.0$  Hz, 2H).  $^{13}\text{C}$  NMR ( $\text{CD}_3\text{OD}$ , 100 MHz)  $\delta$  (ppm): 17.5, 18.2, 23.8, 24.6, 27.5, 28.5, 32.3, 32.8, 33.3, 40.6, 47.0, 47.5, 50.3, 50.5, 52.9, 53.1, 55.5, 59.2, 68.9, 70.3, 70.6, 72.0, 76.0, 115.6, 115.8, 116.8, 118.5, 121.1, 128.4, 128.8, 130.6, 130.7, 131.0, 133.5, 133.8, 135.2, 138.0, 138.4, 142.4, 157.9, 164.3, 167.4, 168.7, 169.6, 171.6, 174.2, 174.7, 174.7, 174.9, 196.7, 201.7. HRMS ( $m/z$ ): calculated for  $\text{C}_{53}\text{H}_{62}\text{N}_9\text{O}_{14}\text{S}$  (M+H): 1080.4131; found: 1080.4135.

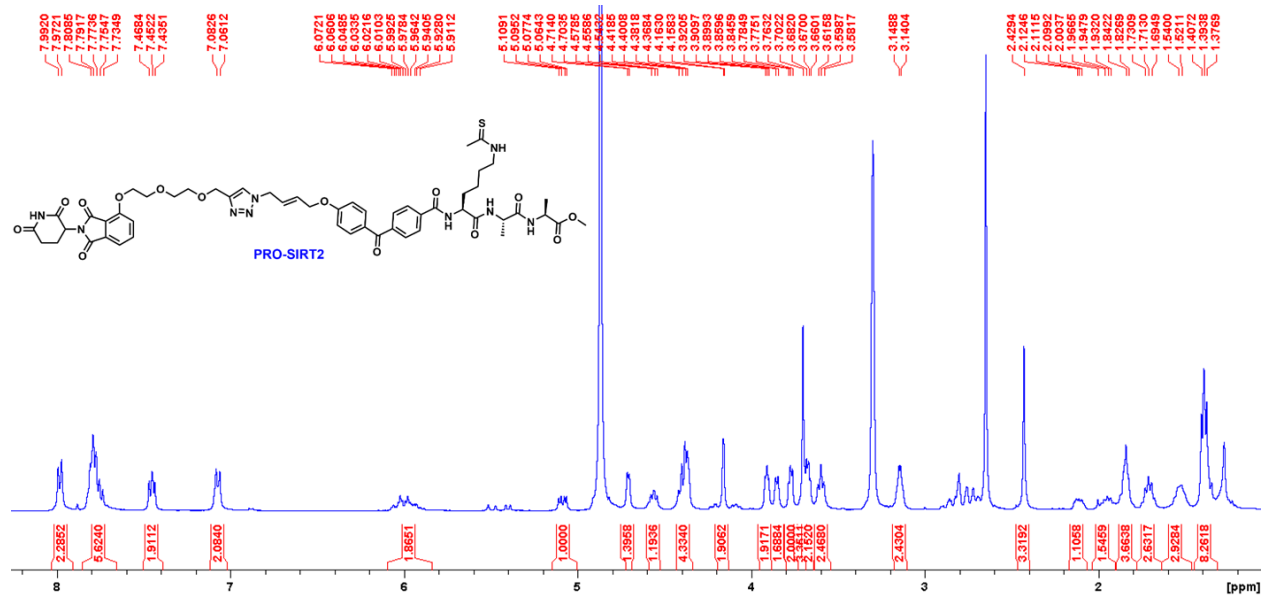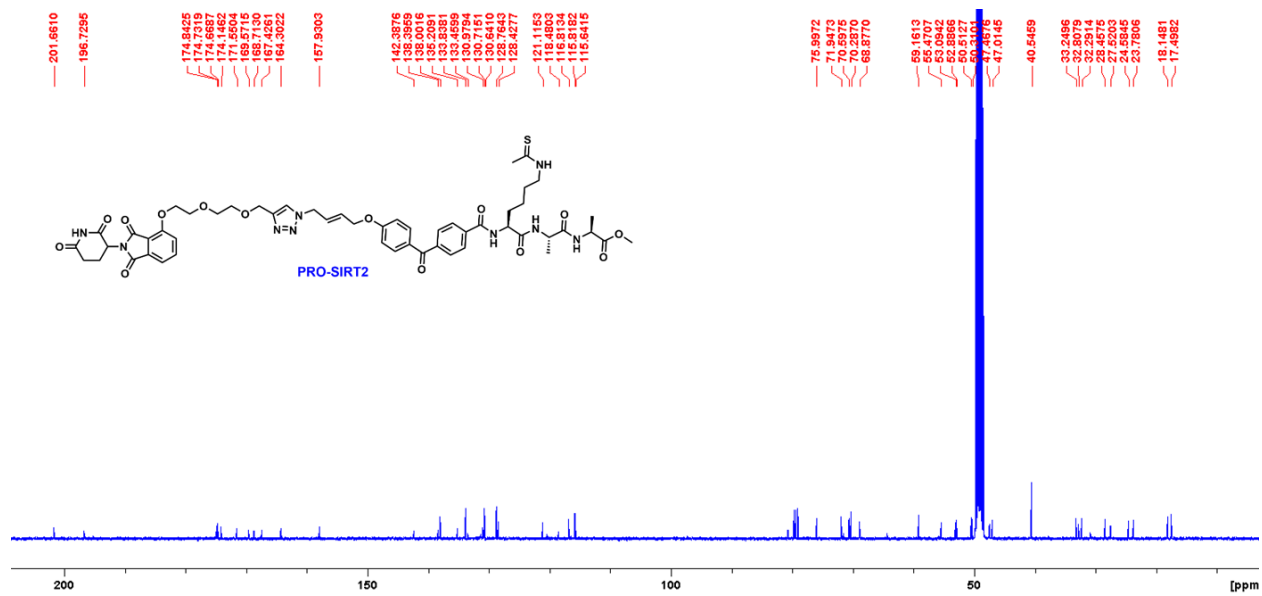

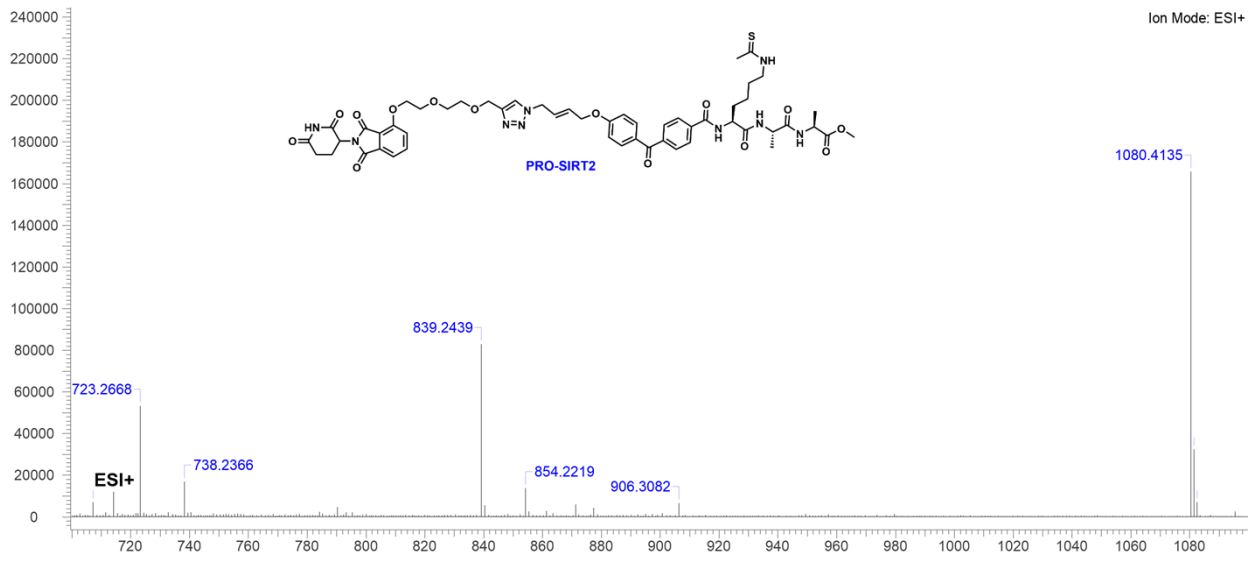

**Table S1. Compounds used in SIRT6 inhibitor screening.**

| Compound # | Name               | Chemical Structure                                                                   |
|------------|--------------------|--------------------------------------------------------------------------------------|
| 1          | TSA                | 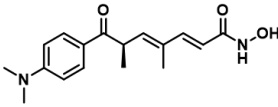   |
| 2          | Nicotinamide (NAM) |   |
| 3          | EX527              |   |
| 4          | Sirtinol           |    |
| 5          | AGK2               |   |
| 6          | Suramin            |  |
| 7          | SirReal2           |  |
| 8          | Thiomyristoyl      |  |



|    |                   |                                                                                       |
|----|-------------------|---------------------------------------------------------------------------------------|
| 9  | Salermide         | 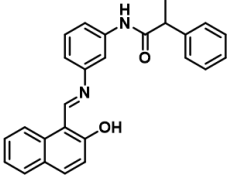    |
| 10 | Valproic acid     |    |
| 11 | Vorinostat (SAHA) |     |
| 12 | Sodium butyrate   |    |
| 13 | RG108             |     |
| 14 | Quercetin         |    |
| 15 | 3-TYP             |  |
| 16 | NRD167            |   |
| 17 | JQ1               |   |
| 18 | Thioguanine       |  |

|    |         |                                                                                                                                                                                                                                                                                                                                                                                                                      |
|----|---------|----------------------------------------------------------------------------------------------------------------------------------------------------------------------------------------------------------------------------------------------------------------------------------------------------------------------------------------------------------------------------------------------------------------------|
| 19 | CPI-455 | 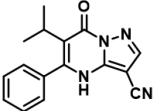 <p>The chemical structure of CPI-455 is a 1,2,4-triazole derivative. It features a central 1,2,4-triazole ring with a carbonyl group (=O) at position 3, a cyano group (-CN) at position 5, and a 2-phenylpropan-2-yl group at position 4. The phenyl ring is attached to the quaternary carbon of the isopropylidene group.</p> |
| 20 | IOX1    |  <p>The chemical structure of IOX1 is a quinoline derivative. It consists of a fused bicyclic system of a benzene ring and a pyridine ring. The quinoline ring has a hydroxyl group (-OH) at position 8 and a carboxylic acid group (-COOH) at position 4.</p>                                                                    |

## REFERENCE

1. Curry, A. M.; Cohen, I.; Zheng, S.; Wohlfahrt, J.; White, D. S.; Donu, D.; Cen, Y., Profiling sirtuin activity using Copper-free click chemistry. *Bioorg Chem* **2021**, *117*, 105413.
